# Supplementary material for: Plasmacytoid Dendritic Cell Impairment in Metastatic Melanoma by Lactic Acidosis
Source: MDPI journal article supplement (doi:10.3390/cancers12082085), 2020-07-28
Supplement: s1 [file s1]

# Supplementary Materials: Plasmacytoid Dendritic Cell Impairment in Metastatic Melanoma by Lactic Acidosis

Matilde Monti, Raffaella Vescovi, Francesca Consoli, Davide Farina, Daniele Moratto, Alfredo Berruti, Claudia Specchia and William Vermi

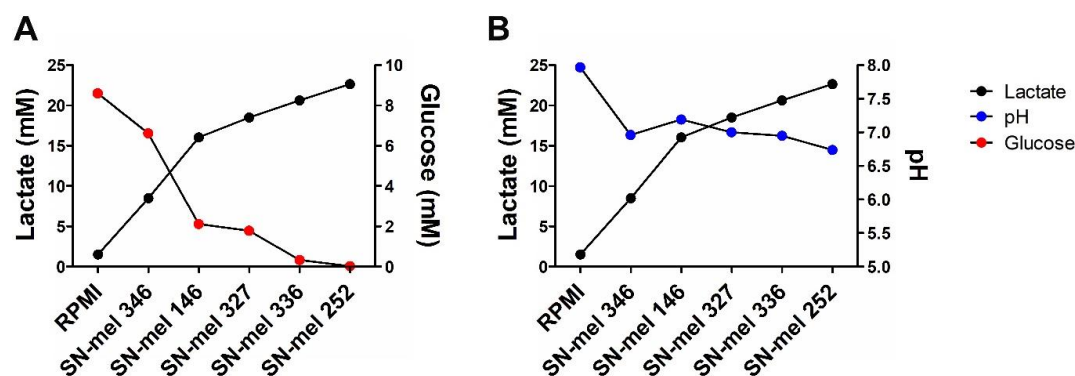

**Figure S1.** Lactate, glucose concentrations and pH levels measured on melanoma cell lines supernatants (SN-mel). Graphs show the concentration of lactate (black dots), glucose (red dots) (A) and the pH level (blue dots) (B) among different SN-mel and RPMI 1640 medium.

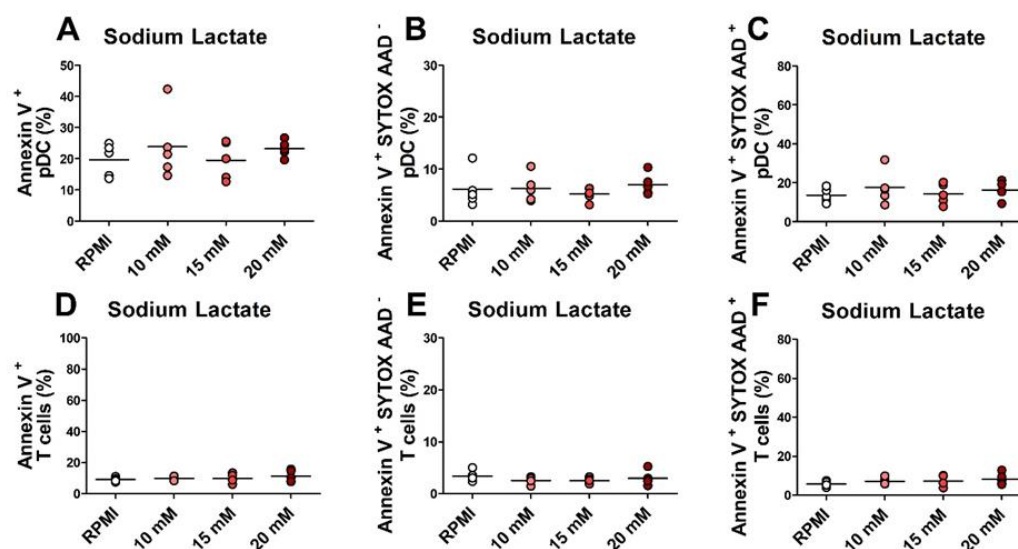

**Figure S2.** Lactosis did not affect the viability of pDCs and T cells. pDCs and T cells purified from buffy coats of HD were cultured in RPMI 1640 medium supplemented with 10% FBS containing Sodium Lactate (10 mM; 15 mM; 20 mM) ( $n = 5$ , A–F) for 24 hours. 20 ng/ml IL-3 was added to pDCs culture. The cellular viability was analyzed by Annexin V/SYTOX AADvanced staining in flow cytometry. Aligned dot plot graphs show the percentages of dead (A, D), early apoptotic (B, E) and late apoptotic or necrotic cells (C, F). Bars represent the mean of biological replicates. The statistical significance was calculated by two-sample paired sign test.

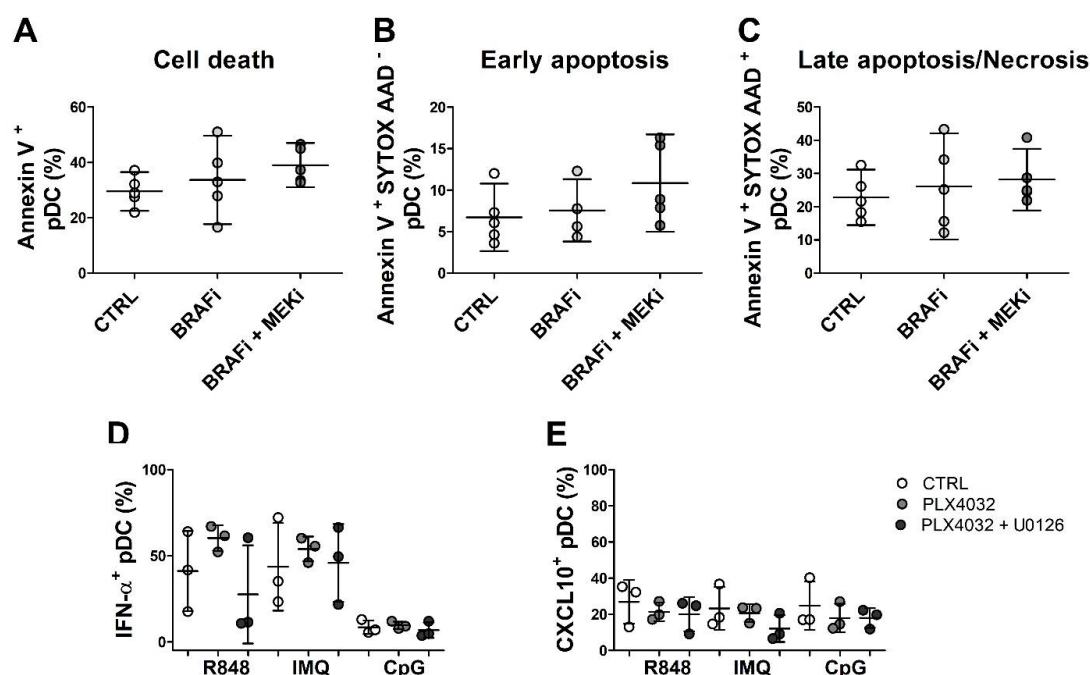

**Figure S3.** BRAF and MEK inhibitors (BRAFi; MEKi) did not affect pDC viability and function. pDCs purified from buffy coats of HD were cultured in RPMI 1640 medium supplemented with 10% FBS and IL-3 (CTRL) and treated with BRAFi (PLX4032 1  $\mu$ M) alone or in combination with MEKi (U0126 12.5  $\mu$ M). pDC viability was analyzed by Annexin V/SYTOX AADvanced staining in flow cytometry ( $n = 5$ ) (A–C). Scatter dot plot graphs illustrate the percentage of dead (A), early apoptotic (B) or late apoptotic/necrotic cells (C); bars represent the mean with 95% CI (A–C). pDCs were stimulated with R848 and Imiquimod (IMQ) for 2 hours (D) and 6 hours (E) and with CpG-ODN 2216 for 6 hours (D, E). IFN- $\alpha$  (D) and CXCL10 (E) were analyzed by intracellular flow cytometry staining ( $n = 3$ ). Scatter dot plot graphs show the percentage of positive pDCs evaluated on BDCA-2<sup>+</sup>/CD123<sup>+</sup> cells; bars represent the mean with SD (D, E). The statistical significance was calculated by two-sample paired sign test.

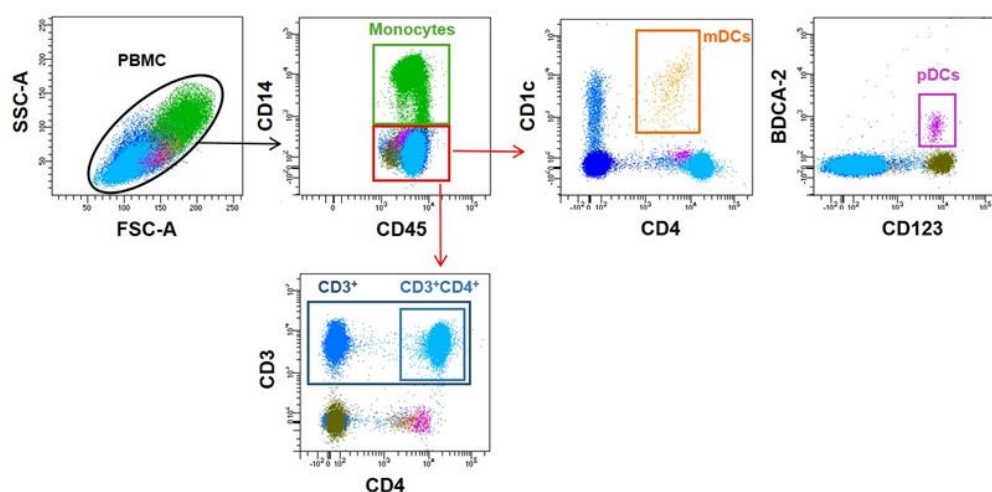

**Figure S4.** Gating strategy for the identification of peripheral blood immune populations. Flow cytometry analysis was performed on whole blood samples. The panels illustrate the gating strategy used to identify pDCs, mDCs, CD3<sup>+</sup> and CD4<sup>+</sup> T cells. At least  $2 \times 10^5$  PBMCs were acquired according to the forward light scatter versus side light scatter profile and doublet discrimination was performed. Among CD14<sup>+</sup> cells, mDCs were recognized as CD45<sup>dim</sup>/CD1c<sup>+</sup>/CD4<sup>dim</sup> cells, whereas pDCs were BDCA-2<sup>+</sup>/CD123<sup>+</sup>. T lymphocytes were recognized as CD45<sup>+</sup>/CD3<sup>+</sup>/CD4<sup>+</sup>.

**Table S1.** Clinical data of the Metastatic Melanoma (MM) cohort.

| Patient | Gender | Age | AJCC Staging | NRAS | BRAF  | LDH (IU/L) | Brain metastasis | Tumor sites | Tumor Burden | RECIST | Therapy                   |
|---------|--------|-----|--------------|------|-------|------------|------------------|-------------|--------------|--------|---------------------------|
| #1      | F      | 63  | M1c          | Q61R | wt    | NA         | No               | >3          | 72.0         | PD     | Ipilimumab                |
| #2      | F      | 53  | M1c          | wt   | wt    | 155 *      | No               | >3          | 52.2         | PD     | Ipilimumab                |
| #3      | M      | 45  | M1c          | wt   | V600E | 230 *      | No               | <3          | 174.4        | PR     | Vemurafenib               |
| #4      | F      | 50  | M1b          | wt   | V600E | 154 *      | No               | <3          | 43.1         | PR     | Vemurafenib               |
| #5      | M      | 43  | M1c          | wt   | V600E | 318 *      | No               | >3          | 408.2        | PR     | Dabrafenib + Trametinib   |
| #6      | M      | 63  | M1a          | wt   | V600K | 152 *      | No               | <3          | 35.0         | SD     | Vemurafenib               |
| #7      | M      | 49  | M1c          | wt   | V600E | 433 **     | No               | >3          | 227.9        | PR     | Dabrafenib + Trametinib   |
| #8      | M      | 67  | M1c          | Q61R | wt    | 286 *      | No               | <3          | 260.3        | PD     | Ipilimumab                |
| #9      | M      | 63  | M1b          | wt   | V600E | 230 *      | No               | <3          | 81.0         | PR     | Dabrafenib + Trametinib   |
| #10     | M      | 76  | M1c          | Q61K | wt    | 220 *      | Yes              | >3          | 137.1        | PD     | Ipilimumab                |
| #11     | M      | 64  | M1c          | wt   | wt    | 558 *      | Yes              | >3          | 309.5        | PD     | Ipilimumab                |
| #12     | M      | 32  | M1c          | wt   | V600E | 160 *      | No               | >3          | 100.7        | PR     | Dabrafenib + Trametinib   |
| #13     | F      | 58  | M1c          | Q61K | wt    | 188 *      | No               | <3          | 8.0          | PD     | Ipilimumab                |
| #14     | M      | 50  | M1b          | Q61R | wt    | 247 *      | No               | <3          | 66.1         | PD     | Ipilimumab                |
| #15     | M      | 60  | M1a          | wt   | wt    | 170 *      | No               | <3          | 83.3         | PR     | Ipilimumab                |
| #16     | M      | 67  | M1c          | wt   | wt    | 320 *      | Yes              | >3          | 230.9        | PD     | Ipilimumab                |
| #17     | M      | 54  | M1a          | Q61R | wt    | 214 *      | No               | <3          | 77.9         | PD     | Ipilimumab                |
| #18     | M      | 48  | M1c          | Q61R | wt    | 1037 *     | Yes              | >3          | 209.5        | PD     | Ipilimumab                |
| #19     | M      | 62  | M1c          | wt   | V600K | 279 *      | Yes              | >3          | 389.9        | PR     | Dabrafenib + Trametinib   |
| #20     | M      | 79  | M1b          | wt   | wt    | 181 *      | No               | >3          | 168.3        | SD     | Ipilimumab                |
| #21     | F      | 60  | M1b          | wt   | V600E | 227 *      | No               | <3          | 44.9         | PR     | Vemurafenib + Cobimetinib |
| #22     | M      | 66  | M1b          | wt   | V600K | 199 *      | No               | <3          | NA           | PD     | Vemurafenib + Cobimetinib |
| #23     | M      | 57  | M1c          | wt   | V600E | 1910 *     | No               | >3          | 165.1        | SD     | Dabrafenib + Trametinib   |
| #24     | M      | 23  | M1c          | wt   | V600E | 526 *      | Yes              | >3          | 293.6        | PD     | Dabrafenib + Trametinib   |
| #25     | F      | 43  | M1a          | wt   | V600E | 143 *      | No               | <3          | 0.0          | SD     | Dabrafenib + Trametinib   |
| #26     | M      | 61  | M1b          | wt   | V600E | 188 *      | No               | <3          | 56.3         | SD     | Dabrafenib + Trametinib   |

| Patient | Gender | Age | AJCC Staging | NRAS | BRAF  | LDH (IU/L) | Brain metastasis | Tumor sites | Tumor Burden | RECIST | Therapy                 |
|---------|--------|-----|--------------|------|-------|------------|------------------|-------------|--------------|--------|-------------------------|
| #27     | M      | 61  | M1b          | wt   | wt    | NA         | No               | <3          | 104.5        | PR     | Pembrolizumab           |
| #28     | M      | 77  | M1a          | wt   | V600E | 121 *      | No               | <3          | 184.9        | CR     | Dabrafenib + Trametinib |
| #29     | F      | 69  | M1c          | wt   | V600K | 184 *      | Yes              | <3          | 116.5        | PD     | Dabrafenib              |

NA = Not Assessable; LDH reference range: \* (134 – 236 IU/L), \*\* (313 – 618 IU/L); CR = Complete Response; PR = Partial Response; SD = Stable Disease; PD = Progressive Disease.

**Table S2.** Peripheral blood immune populations in the MM molecular groups at baseline (T0; N = 29).

| Immune Cell Population      |      | MM with BRAF <sup>V600+</sup><br>(N = 16) |        |           | MM with NRAS <sup>Q61+</sup><br>(N = 7) |        |           | MM BRAF <sup>wt</sup> /NRAS <sup>wt</sup><br>(N = 6) |        |           | p * |
|-----------------------------|------|-------------------------------------------|--------|-----------|-----------------------------------------|--------|-----------|------------------------------------------------------|--------|-----------|-----|
|                             |      | N                                         | Median | IQR       | N                                       | Median | IQR       | N                                                    | Median | IQR       |     |
| n° leukocytes/μL            |      | 14                                        | 7350   | 6610–9660 | 5                                       | 8290   | 4930–9110 | 4                                                    | 8040   | 6635–9315 | 0.9 |
| % neutrophils on LK         |      | 14                                        | 62.5   | 54.1–69   | 4                                       | 46.1   | 36.3–59.3 | 4                                                    | 51.5   | 47.5–64.8 | 0.3 |
| % lymphocytes on LK         |      | 14                                        | 24.6   | 17–30.4   | 4                                       | 31.4   | 11.7–41.1 | 4                                                    | 34.5   | 25.2–37.4 | 0.4 |
| % monocytes on LK           |      | 14                                        | 8.3    | 7.1–10.5  | 4                                       | 7      | 3.5–9.8   | 4                                                    | 9.4    | 7.1–11.7  | 0.6 |
| % eosinophils on LK         |      | 14                                        | 2.1    | 0.5–2.5   | 4                                       | 1.4    | 0.7–2     | 4                                                    | 1.7    | 1.1–3.9   | 0.6 |
| % basophils on LK           |      | 14                                        | 0.5    | 0.4–0.5   | 4                                       | 0.8    | 0.4–1     | 4                                                    | 0.6    | 0.6–0.8   | 0.1 |
| % pDCs on PBMCs             |      | 16                                        | 0.3    | 0.2–0.3   | 7                                       | 0.2    | 0.1–0.5   | 6                                                    | 0.2    | 0–0.3     | 0.6 |
| % mDCs on PBMCs             |      | 16                                        | 0.3    | 0.2–0.5   | 7                                       | 0.4    | 0.1–0.7   | 6                                                    | 0.3    | 0.2–0.3   | 0.8 |
| % CD3 <sup>+</sup> on PBMCs |      | 16                                        | 59.4   | 52.6–61.6 | 7                                       | 53.1   | 40.7–68.9 | 6                                                    | 61.3   | 57.2–66.8 | 0.4 |
| % CD4 <sup>+</sup> on PBMCs |      | 16                                        | 28.7   | 24.5–40.8 | 7                                       | 17.8   | 16.8–40.1 | 6                                                    | 30.9   | 28.7–34.4 | 0.2 |
| % IFN-α <sup>+</sup> pDCs   | R848 | 16                                        | 47.7   | 28.1–72.2 | 7                                       | 60.4   | 10.3–65   | 4                                                    | 58.6   | 49.6–72.2 | 0.7 |
|                             | IMQ  | 16                                        | 24.4   | 9.9–49    | 7                                       | 27     | 8.7–38.2  | 4                                                    | 13.3   | 8.7–41.4  | 0.9 |
|                             | CpG  | 14                                        | 9.8    | 4.1–14.5  | 7                                       | 9.3    | 6.3–10.6  | 5                                                    | 9.3    | 5.4–11.7  | 0.9 |
| % CXCL10 <sup>+</sup> pDCs  | R848 | 13                                        | 81.8   | 71.9–85.8 | 7                                       | 80     | 4.8–85.2  | 4                                                    | 74.5   | 62.7–76.1 | 0.3 |
|                             | IMQ  | 13                                        | 48.8   | 46.4–61.8 | 7                                       | 45.7   | 14.7–61.2 | 4                                                    | 34.8   | 21.4–55.3 | 0.5 |
|                             | CpG  | 13                                        | 8.8    | 3.7–12.3  | 7                                       | 5.7    | 4.6–23.7  | 5                                                    | 7.1    | 2.9–7.7   | 0.9 |

IQR (interquartile range): Q1–Q3; LK: leukocytes; \* p: p-value referred to comparison among the three different molecular groups of MM patients.

**Table S3.** Analysis of the overall survival (OS) and the progression free survival (PFS) among MM patients ( $N = 29$ ) during the follow-up.

|     | MM<br>( $N = 29$ )              | BRAF <sup>V600+</sup> MM<br>( $N = 16$ ) | NRAS <sup>Q61+</sup> MM<br>( $N = 7$ ) | BRAF <sup>wt</sup> /NRAS <sup>wt</sup> MM<br>( $N = 6$ ) |
|-----|---------------------------------|------------------------------------------|----------------------------------------|----------------------------------------------------------|
| OS  | number (%) of deaths            | 18 (62)                                  | 10 (63)                                | 6 (86)                                                   |
|     | median time (months)            | 14                                       | 17                                     | 5                                                        |
|     | survival at 12 months* (95% CI) | 0.52 (0.33–0.68)                         | 0.62 (0.35–0.81)                       | 0.14 (0.01–0.46)                                         |
| PFS | number (%) of progressions**    | 22 (76)                                  | 10 (63)                                | 7 (100)                                                  |
|     | median time (months)            | 4                                        | 12                                     | 3                                                        |
|     | survival at 12 months* (95% CI) | 0.30 (0.15–0.47)                         | 0.50 (0.25–0.71)                       | –                                                        |

\*months from therapy initiation; \*\*all deaths went into disease progression.

**Table S4.** Univariate and multivariate Cox regression models for PFS in MM patients at baseline (T0;  $N = 29$ ).

| Immune Cell Population      | Univariate  |             |           | Multivariate <sup>o</sup> |     |           |
|-----------------------------|-------------|-------------|-----------|---------------------------|-----|-----------|
|                             | HR          | $p$         | 95% CI    | HR                        | $p$ | 95% CI    |
| n° leukocytes/ $\mu$ L      | 1.04**      | 0.51        | 0.93–1.15 |                           |     |           |
| % neutrophils on LK         | 0.99        | 0.80        | 0.95–1.04 |                           |     |           |
| % lymphocytes on LK         | 0.96        | 0.14        | 0.91–1.01 |                           |     |           |
| % monocytes on LK           | 1.07        | 0.57        | 0.86–1.32 |                           |     |           |
| % eosinophils on LK         | 0.75        | 0.18        | 0.49–1.14 |                           |     |           |
| % basophils on LK           | 0.97*       | 0.76        | 0.79–1.19 |                           |     |           |
| % pDCs on PBMCs             | 0.76*       | 0.08        | 0.56–1.04 |                           |     |           |
| % mDCs on PBMCs             | 0.91*       | 0.45        | 0.03–4.42 |                           |     |           |
| % CD3 <sup>+</sup> on PBMCs | 0.97        | 0.14        | 0.93–1.01 |                           |     |           |
| % CD4 <sup>+</sup> on PBMCs | <b>0.95</b> | <b>0.02</b> | 0.91–0.99 | 0.98                      | 0.6 | 0.94–1.04 |
| % IFN- $\alpha$ pDCs        | R848        | 0.99        | 0.31      | 0.97–1.01                 |     |           |
|                             | IMQ         | 0.99        | 0.26      | 0.97–1.01                 |     |           |
|                             | CpG         | 0.97        | 0.24      | 0.92–1.02                 |     |           |
| % CXCL10 <sup>+</sup> pDCs  | R848        | 0.98        | 0.08      | 0.97–1.00                 |     |           |
|                             | IMQ         | 0.99        | 0.61      | 0.97–1.02                 |     |           |
|                             | CpG         | 1.02        | 0.24      | 0.99–1.04                 |     |           |

LK: leukocytes; \*HR associated with a 0.1 unit increase; \*\*HR associated with a 1000 unit increase;  $p$ :  $p$ -value; <sup>o</sup>adjusted for molecular profile (NRAS<sup>Q61+</sup> vs BRAF<sup>V600+</sup> or BRAF<sup>wt</sup>/NRAS<sup>wt</sup>) and stage of the disease (M1c vs M1a or M1b). The significant  $p$ -values and relative hazard ratio are highlighted in bold.

**Table S5.** Antibodies used for flow cytometry.

| Reagent         | Clone    | Conjugation | Source           |
|-----------------|----------|-------------|------------------|
| <b>Panel #1</b> |          |             |                  |
| CD303           | AC144    | FITC        | Miltenyi Biotec  |
| CD123           | AC145    | VioBlue     | Miltenyi Biotec  |
| CD16            | 3G8      | PE          | Becton Dickinson |
| CD8             | HIT8a    | PerCP Cy5.5 | Becton Dickinson |
| CD3             | UCHT1    | PE Cy7.7    | Becton Dickinson |
| CD45RA          | 2D1      | APC H7      | Becton Dickinson |
| CD4             | RPA-T4   | V450        | Becton Dickinson |
| CD1c            | F10/21A3 | PE          | Becton Dickinson |
| CD19            | HIB19    | FITC        | Becton Dickinson |
| CD14            | M5E2     | FITC        | Becton Dickinson |
| <b>Panel #2</b> |          |             |                  |
| CD303           | AC144    | FITC        | Miltenyi Biotec  |
| CD123           | AC145    | VioBlue     | Miltenyi Biotec  |
| IFN- $\alpha$   | REA1013  | APC         | Miltenyi Biotec  |
| CXCL10/IP-10    | J034D6   | PE          | Biolegend        |

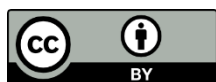

© 2020 by the authors. Submitted for possible open access publication under the terms and conditions of the Creative Commons Attribution (CC BY) license (<http://creativecommons.org/licenses/by/4.0/>).
